# Supplementary material for: Assisted natural recovery of hypersaline sediments: salinity thresholds for the establishment of a community of bioturbating organisms
Source: Royal Society of Chemistry journal article supplement (doi:10.1039/c8em00092a), 2018-01-01
Supplement: c8em00092a1.pdf [file c8em00092a1.pdf]

## Supplementary Information

### Assisted natural recovery of hypersaline sediments: salinity thresholds for the establishment of a community of bioturbating organisms

Timothy M. Remaili<sup>a,b,d</sup>, Stuart L. Simpson<sup>b</sup>, William W. Bennett<sup>a</sup>, Joshua J. King<sup>b</sup>, Luke M. Mosley<sup>c</sup>, David T. Welsh<sup>a</sup>, Dianne F. Jolley<sup>d</sup>

#### Methods A: general chemical methods

##### Sediment characterisation

Quantitative x-ray powder diffractometry (XRD, Philips PW 1771/00 diffractometer) was used to characterise the initial 400 psu sediments using Cu K $\alpha$  radiation, x-ray-tube at 1 kW and a Spellman DF3 generator (40 kV and 30 mA). Sediment was dried and crushed before being analysed with a diffraction angle of two theta ranging from 4 to 70° at a step size of 0.02°. Estimated quantities of crystalline material were quantified directly from the x-ray powder diffraction traces using the PANalytical X'Pert Highscore Plus Version 2 software.

Elemental analysis of the sediments (metals and major ions) was made on dried and crushed samples following a low-pressure microwave assisted (MARS 5, CEM) aqua-regia digestion of the samples (Belzunce-Segarra et al., 2015). As the sediments were not significantly contaminated (i.e. metal concentrations were well below the sediment quality guideline values (Simpson and Batley, 2016)), these particulate analyses targeted the major 'saltwater ions' Na<sup>+</sup>, K<sup>+</sup>, Mg<sup>2+</sup>, Ca<sup>2+</sup>, and SO<sub>4</sub><sup>2-</sup>. For QC, 10% of the samples were blanks and all were measured in duplicate, with the mean result reported, with certified reference materials (CRMs) for metals (ERM<sup>®</sup>-CC018, European Reference Material), with recoveries falling between 90 – 105%. For the target seawater ions, sediment digests were validated against in-house calcium recovery values of the sediment CRM, with 100 – 105% recoveries. To validate the performance of the instrumental analyses, spike recoveries were performed on selected digest diluents, with recoveries within 90 – 100% for all ions of interest. Blanks were less than practical quantitation limits (PQLs) and duplicates were typically within 20% for target elements. Acid-volatile sulfide (AVS) in sediments was determined colorimetrically as per Simpson (2001). Total organic carbon (TOC) analysis was conducted using a high temperature CO<sub>2</sub> evolution method, in which dried and crushed samples were acid-treated to remove inorganic carbonates followed by combustion (LECO furnace) in the presence of strong oxidants/catalysts and infrared detection of CO<sub>2</sub>.

35

36 Pore water-brines and metal analyses

37 Brine densities and total dissolved solid (TDS) concentrations were determined gravimetrically using  
38 pre-weighed 5 mL polycarbonate vials, which were then heated to 90°C for 48 h (low temperature  
39 used to minimise the loss of organic carbon fractions). Estimations of porewater turbidity were  
40 undertaken at 750 nm using a UV-VIS spectrophotometer (LKB Biochrom Ultraspec 2E, glass cuvette,  
41 1 cm path length).

42 Water samples taken for analyses of seawater elements (Na, K, Mg, Ca, chloride and sulfate) and  
43 metals were filtered (0.45 µm cellulose nitrate, 25 mm Minisart Sartorius) and acidified to 2% HNO<sub>3</sub>  
44 (v/v, Tracepur, Merck) before storage (<4°C). Analyses were made by ICP-AES (Varian 730-ES), where  
45 porewater brine solutions were diluted as necessary (up to 100-fold) to be within the concentration  
46 range of the standards (1 – 10,000 mg L<sup>-1</sup>; QCS-27, High-Purity Standards in deionised water). To  
47 validate the performance of the instrumental analyses, spike recoveries were performed on selected  
48 diluents, with recoveries within 90 – 110% for all ions of interest. For QA/QC, 10% of the samples  
49 were blanks and all were measured in duplicate, with the mean result reported. Blanks were less than  
50 practical quantitation limits (PQLs) and duplicates were typically within 20% for metals.

51

52 The quantification of bromide (Br<sup>-</sup>), chloride (Cl<sup>-</sup>) and sulfate (SO<sub>4</sub><sup>2-</sup>) was done by ion chromatography  
53 with direct conductivity detection (IC-CD) (Metrohm 838 IC-CD). QC for the IC method was undertaken  
54 by using spike recovery where recoveries were between 90 – 110%.

55

56 Physicochemistry

57 Salinity measurements were made using a Mettler Toledo Seven2Go S3 conductivity meter fitted with  
58 an InLAB® 73X series conductivity probe. If salinities exceeded the probe's calibration range, solutions  
59 were diluted 5- to 10-fold with RO water and the salinities remeasured, and then multiplied by the  
60 dilution factor. Dissolved oxygen (DO) and pH were measured using WTW (Wissenschaftlich-  
61 Technische Werstätten) instruments (Multi 3410 with FDO® 925 probe and pH320 with SenTix 41 pH  
62 electrode) calibrated as per manufacturer's instructions. Dissolved ammonia was measured using a  
63 rapid test kit (API Fish Care, LR8600).

65 **Methods B: test media preparation**

66 Sediments

67 For whole-sediment bioassays, treatments with porewater salinities ranging from 50 to 400 psu were  
68 prepared by washing the Dry Creek sediment with RO water. For each wash, approximately 1 kg of  
69 sediment was suspended in the RO water by vigorous shaking by hand for several minutes, followed  
70 by rolling for 3 h. Sediments were left to settle at 4°C for > 24 h and the overlying waters decanted off  
71 before the remaining slurry was centrifuged (9700 g). The salinities of the extracted porewater-brines  
72 were measured before storage in polyethylene bottles and then the sediments were reconstituted  
73 back into their respective containers, mixed well and then stored at 4°C.

74

75 Pore water-brines

76 As filtering most of the porewater-brines was near-impossible due to their high viscosities, they  
77 were extracted by centrifuging (6,000 - 9,000 g, 2 × 30 min bursts) the original and RO-washed Dry  
78 Creek sediments, and the dark, viscous brines collected via decantation. The brine extracted from  
79 the initial, un-manipulated sediment had a salinity of approximately 400 psu. To prepare for the  
80 porewater brine bioassays (50, 100 and 200 psu), the brines were centrifuged for 1 h (9,000 g) to  
81 remove most of the suspended material, and then diluted with RO water to produce waters covering  
82 the desired salinity range (40, 60, 65, 70, 80 and 300 psu). Diluted brines were mixed for 1 h  
83 (magnetic stirrer) prior to bioassay commencement to ensure homogeneity. To compare the effect  
84 of salt composition to toxicity, an additional artificial brine solution of salinity of 50 psu was  
85 prepared by dissolving artificial sea salts (Instant Ocean<sup>®</sup> Sea Salt) in seawater until the salinity was  
86 reached.

87 Test organism handling

88 The epibenthic amphipod *Melita plumulosa* (Zeidler, 1989) and harpacticoid copepod *Nitocra spinipes*  
89 (Boeck, 1865) are endemic to the estuaries of south-eastern Australia, and were obtained from  
90 previously established laboratory cultures, maintained as described by Spadaro and Simpson<sup>26,27</sup>. The  
91 burrowing amphipod *Victoriopisa australiensis* (Chilton, 1923; 2-3 cm body length) gastropod *Pyrazus*  
92 *ebeninus* (mud whelk; Bruguière, 1792; 3-4 cm shell length) and polychaete *Neanthes succinea* (Frey  
93 & Leuckart, 1847; 3-4 cm body length) were collected via sieve (2 - 4 mm mesh). Individual burrowing  
94 mangrove crabs *Parasesarma erythroductyla* (Hess, 1865; 4-5 cm leg span) were collected by hand  
95 and plastic spatula. The bivalve was sourced *Plebidonax deltoides* (Lamarck, 1818; 5-6 cm shell length)  
96 was sourced from the Younghusband Peninsula, South Australia via sieve. All benthic organisms were  
97 stored within maintained and aerated cultures of their native sediments in a temperature-controlled  
98 laboratory (21 ± 1.0°C) for two weeks prior to their use in tests. Organisms (except the crab) were fed

99 a mixture of sera Micron Powdered Food (containing approximately 50% Spirulina and 16% Krill) and  
100 a mixture of in-house cultured algal species (temperate *Ceratoneis closterium*, Temperate *Tetraselmis*  
101 *sp.* and Tropical *Tisochrysis lutea*). Crabs were fed a mixture of John West Tuna (*Katsuwonus pelamis*)  
102 chunks and Aqua One 10mm Vege wafers. Crab cultures also contained a matrix of bark and mangrove  
103 vegetation collected from their collection site for shelter and food, and underwent 6-h tide cycles  
104 three times per week. Cysts of the shrimp *Artemia salina* (Linnaeus, 1758) were sourced from the  
105 Great Salt Lake, Utah USA by Aquasonic Pty Ltd. Nauplii of *A. salina* were prepared by cyst reactivation  
106 in fresh seawater ( $31 \pm 1.3$  psu,  $23 \pm 1$  °C) under fluorescent light with gentle aeration and used after  
107 48-h of acclimatisation. Nauplii were fed with fed with sera Micron Powdered Food (containing  
108 approximately 50% Spirulina and 16% Krill) every 24-h.

109

#### 110 **Methods C: bioassays**

111 The bioassay endpoints differed between species, and included behaviour, e.g. Avoidance and  
112 movement behaviour (mollusc: gastropods and bivalve), endurance (time to death, using most test  
113 organisms), and reproduction/development (crustacean: amphipod, and shrimp. Brief summaries of  
114 the test are provided below. At the start of tests, porewaters were extracted from sediments and  
115 salinity measurements were made on these pore waters and repeated for the porewater brines that  
116 had been stored. In all tests, physicochemical measurements were made periodically (dissolved  
117 oxygen (DO), temperature, salinity, pH, ammonia and seawater ions).

118

119 Avoidance tests – measuring the threshold for recolonisation

#### 120 *120-h Pore water-brine bioassays*

121 Brine avoidance tests were undertaken using the gastropod *P. ebeninus* (mud whelk) and bivalve *P.*  
122 *deltoides* by observing the time taken for either reorientation in brine or burial in brine-saturated  
123 sand. For the gastropod bioassay, two individuals were placed corneous-operculum up into 250 mL  
124 beakers containing 150 mL of test solution (salinities of 30 – 400 psu), and the time taken for them to  
125 flip over was measured. Following 96-h exposure, the gastropods were transferred to seawater ( $31$   
126  $\pm 1.3$  psu) and the test repeated to compare post-exposure recovery. The bivalve burial bioassay was  
127 conducted using a single bivalve, placed in a 250 mL beaker containing 200 g of clean sand saturated  
128 with the test solution (seawater or brine of varied salinity), and the time taken to bury was measured.  
129 Three replicates were conducted for each test for both species.

130

131

132

133 *120-h Sediment bioassays*

134 Sediment avoidance tests were undertaken with the amphipod, *M. plumulosa*, and the gastropod, *P.*  
135 *ebeninus*, following the approach described by Ward et al. (2013), with the following changes. The  
136 chamber design for the avoidance tests are shown in Figure S5 of the SI. For both organisms, sediments  
137 with three salinities were tested,  $30 \pm 2.0$  (control), 50 and 100 psu. Each treatment was prepared in  
138 triplicate, with two sediments tested separated by a polycarbonate barrier (within the chamber). The  
139 control sediment was placed on the left-hand side, and a more saline sediment placed on the right-  
140 hand side. In the control treatment, the control sediment was placed on each side of the barrier. The  
141 overlying water was initially  $31 \pm 1$  psu and increased in the tests that contained a portion of  
142 hypersaline sediment, because the overlying water salinity was the same on both sides of the exposure  
143 chamber. For the amphipod test, 30 adult organisms (8-12 mm body length) were placed on the right-  
144 hand side (treatment) of a barrier and no organisms on the left (control), the organisms were left to  
145 adjust for 5 min, the barrier was removed for 120-h (avoidance test termination), and the numbers of  
146 amphipods on each side of the barrier were counted. For the gastropod tests, four organisms (2-3 cm  
147 shell length) were placed on the midline between the two sediments (no initial barrier) and after 120-h  
148 a barrier was added. The number of gastropods on each side of the barrier were then counted, and  
149 the number buried on each side also quantified. For the gastropod, the test was then repeated to  
150 reduce the variability resulting from these being slow-moving organisms.

151 *Endurance tests with amphipod, copepod, polychaete worm, and crabs in porewater-brines*

152 Organism endurance, assessed by considering the length of time an organism can survive  
153 unfavourable conditions, was undertaken in porewater brine solutions with salinities ranging from 40  
154 - 400 psu. Five organisms were assessed: copepod (*N. spinipes*), amphipod (*M. plumulosa*), amphipod  
155 (*V. australiensis*), polychaete (*N. succinea*) and crab (*P. erythodactyla*). These were added to test  
156 chambers (3 to 4 replicates). The time taken to death was recorded to evaluate a threshold limit. The  
157 test conditions are shown in Tables S4 and S8. If no effect was observed (after 68-h for copepod and  
158 amphipod, and after 120-h for crab and polychaete tests), treatments were terminated.

159 *Amphipod reproduction and survival tests*

160 The survival and reproduction of the amphipod *M. plumulosa* was assessed in 10-d renewed whole-  
161 sediment bioassays as per Spadaro and Simpson (2016a) using sediments with porewater salinities of  
162  $30 \pm 2$  (control), 50, 60, 70, 80, 100, 200, 300 and 400 psu. In brief, 40 g of test sediment was added  
163 to 250 mL beakers covered with 150 mL of fresh seawater and left to equilibrate for 1-day, the waters  
164 were exchanged, and organisms added, and the number of juveniles and embryos counted after 10  
165 days. Sediments were renewed on day 5, and waters were exchanged on days 3, 5 and 7 with  
166 periodical physicochemical measurements taken.

167 Shrimp toxicity tests

168 The survival of shrimp nauplii and development of brine shrimp eggs were assessed in separate tests.

169 A 24-h survival bioassay was undertaken using 3-d old nauplii of *A. salina*. From a batch of nauplii, 10  
170 organisms were transferred via pipette into microwell plates (Sigma® cell culture plates polystyrene,  
171 well area = 9.5 cm<sup>2</sup>, 6 wells per plate) containing 5 mL of test solution. Four replicates were tested for  
172 each salinity treatment (30, 40, 50, 100, 200, 400 psu). The plates were covered with Parafilm and  
173 incubated at 23 ± 1°C (Labec Refrigerated Cycling Incubator, 12:12-h light:dark cycle, light  
174 intensity = 3.5 μmol photons/s/m<sup>2</sup>) for 24 h. After 24-h, survival of the nauplii was determined by first  
175 chilling organisms in the microwell plates at 4°C for at least 1 h to suppress the nauplii movement, and  
176 then counting the surviving nauplii under light microscopy (Leica dissecting microscope).

177

178 A 48-h gastrulation (cyst development) bioassay was undertaken using desiccated shrimp eggs.  
179 Twenty eggs were transferred via spatula to Sigma® cell culture plates (polystyrene, well area = 9.5  
180 cm<sup>2</sup>, 6 wells per plate) containing 5 mL of test solution. The plates were gently swirled to ensure eggs  
181 were submerged into their respective solutions before they were capped and incubated for 48 h at  
182 23 ± 1°C (Labec Refrigerated Cycling Incubator, 12:12-h light:dark cycle, light intensity = 3.5 μmol  
183 photons/s/m<sup>2</sup>) with agitation at 24 h. At the completion of test, the plates were chilled at 4°C for at  
184 least 1 h to suppress the nauplii movement, and then the nauplii and remaining dormant eggs were  
185 counted by light microscopy (Leica dissecting microscope). Four replicates were tested for each  
186 salinity treatment. For quality control (QC) purposes for both amphipod and shrimp bioassays, tests  
187 were only deemed valid if survival and reproduction/development in all control replicates for each  
188 test was >80%. For the shrimp bioassay, >80% development of dormant cysts to nauplii within the  
189 control seawater (30 psu) occurred within between 24 – 36 h.

190

191

192

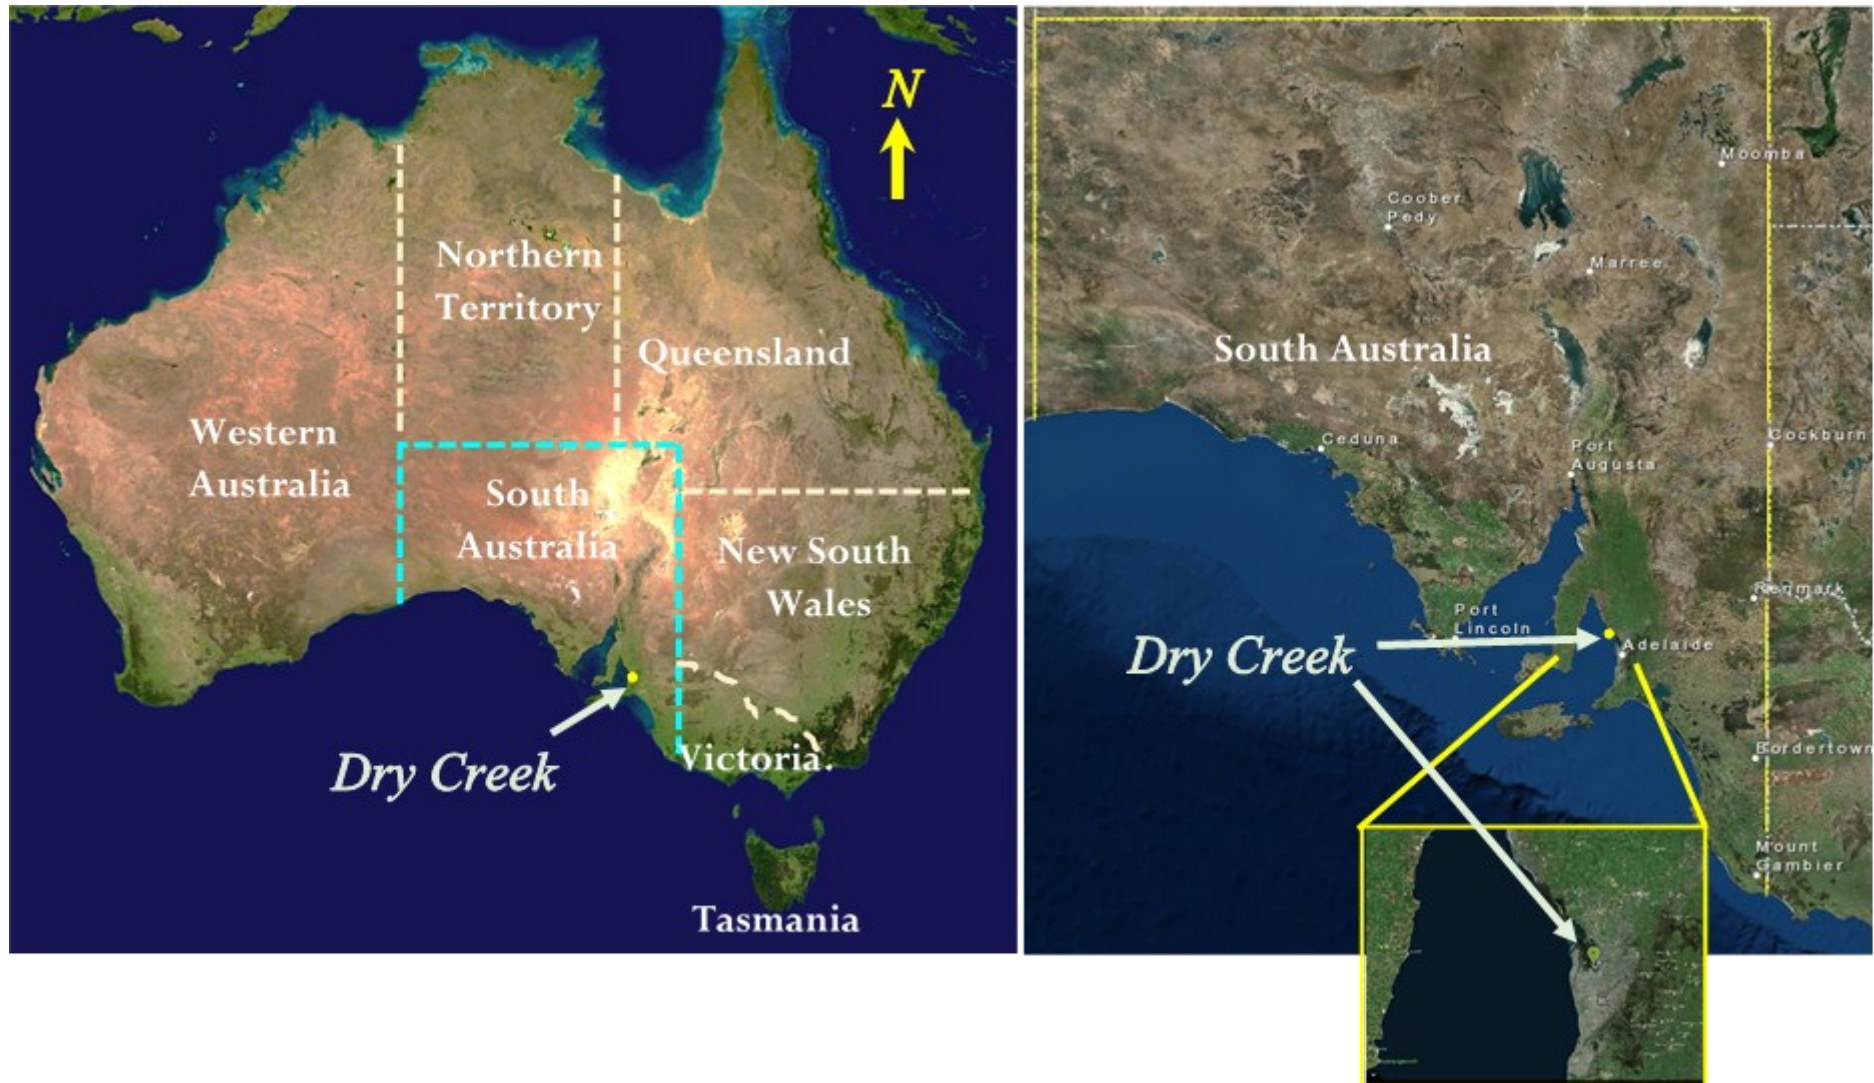

**Figure S1.** Satellite images depicting locality of dry creek in South Australia.

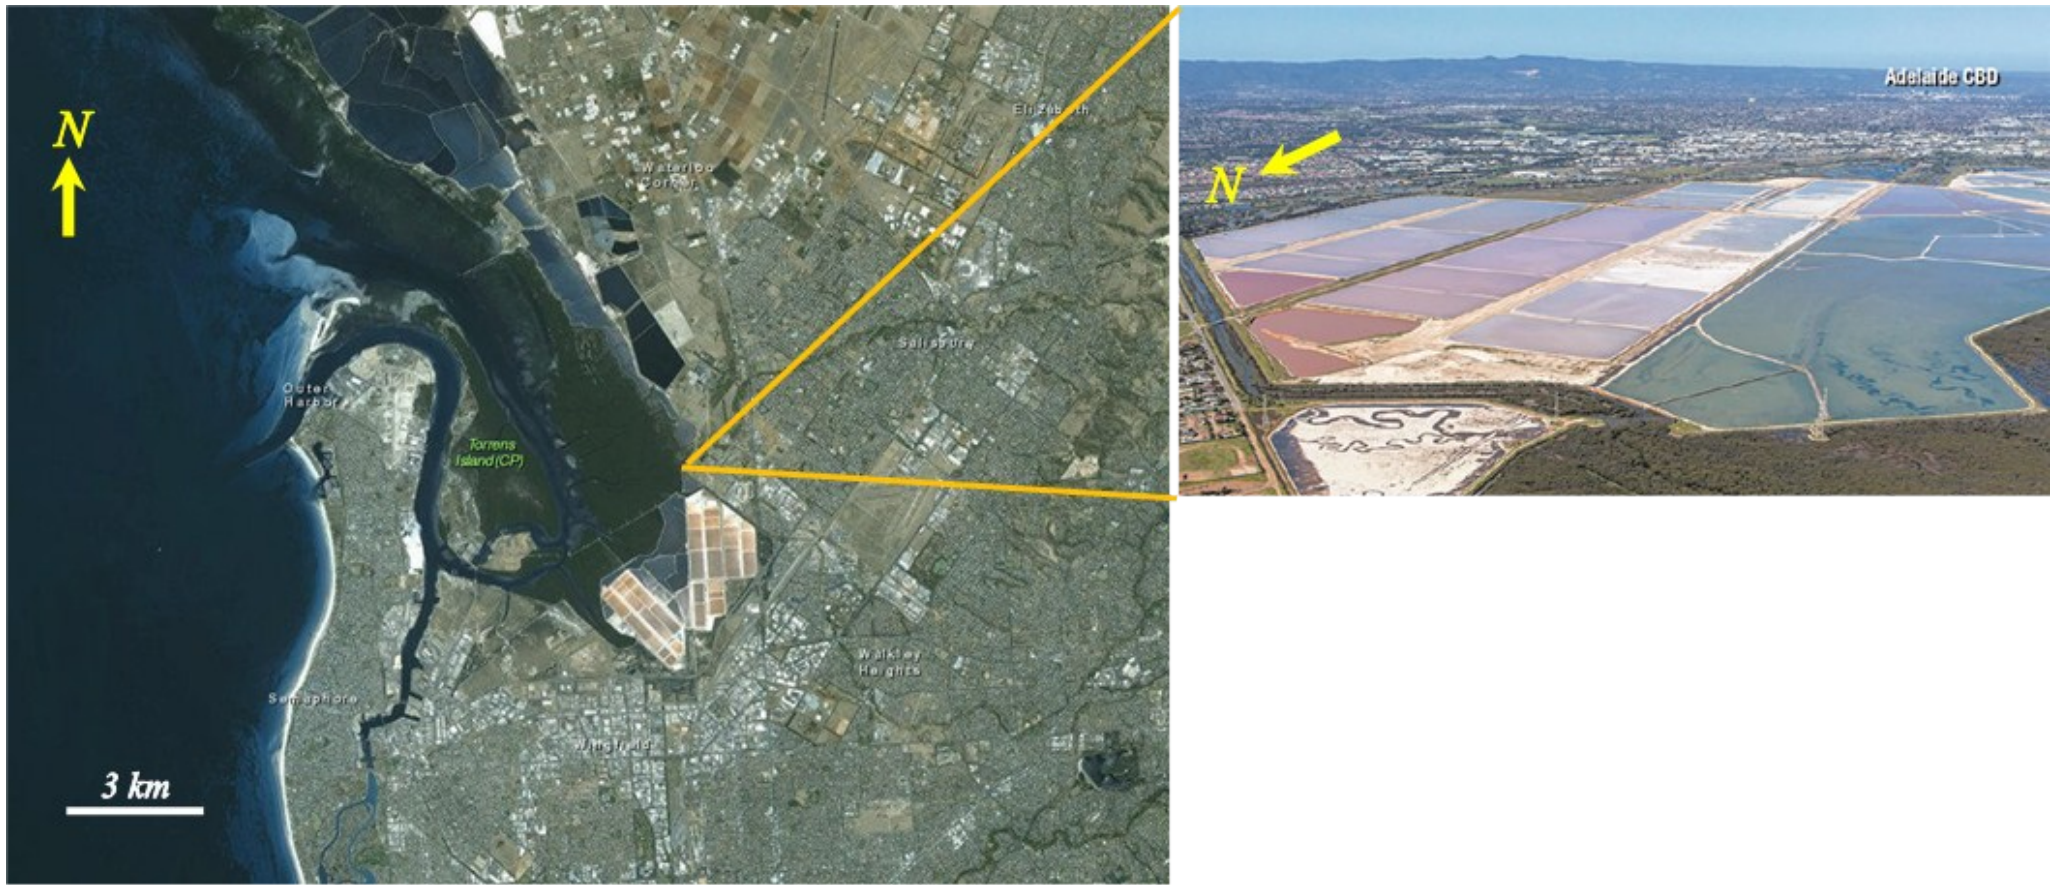

Figure S2. Satellite (left) and aerial (right) imagery of the Dry Creek solar salt fields



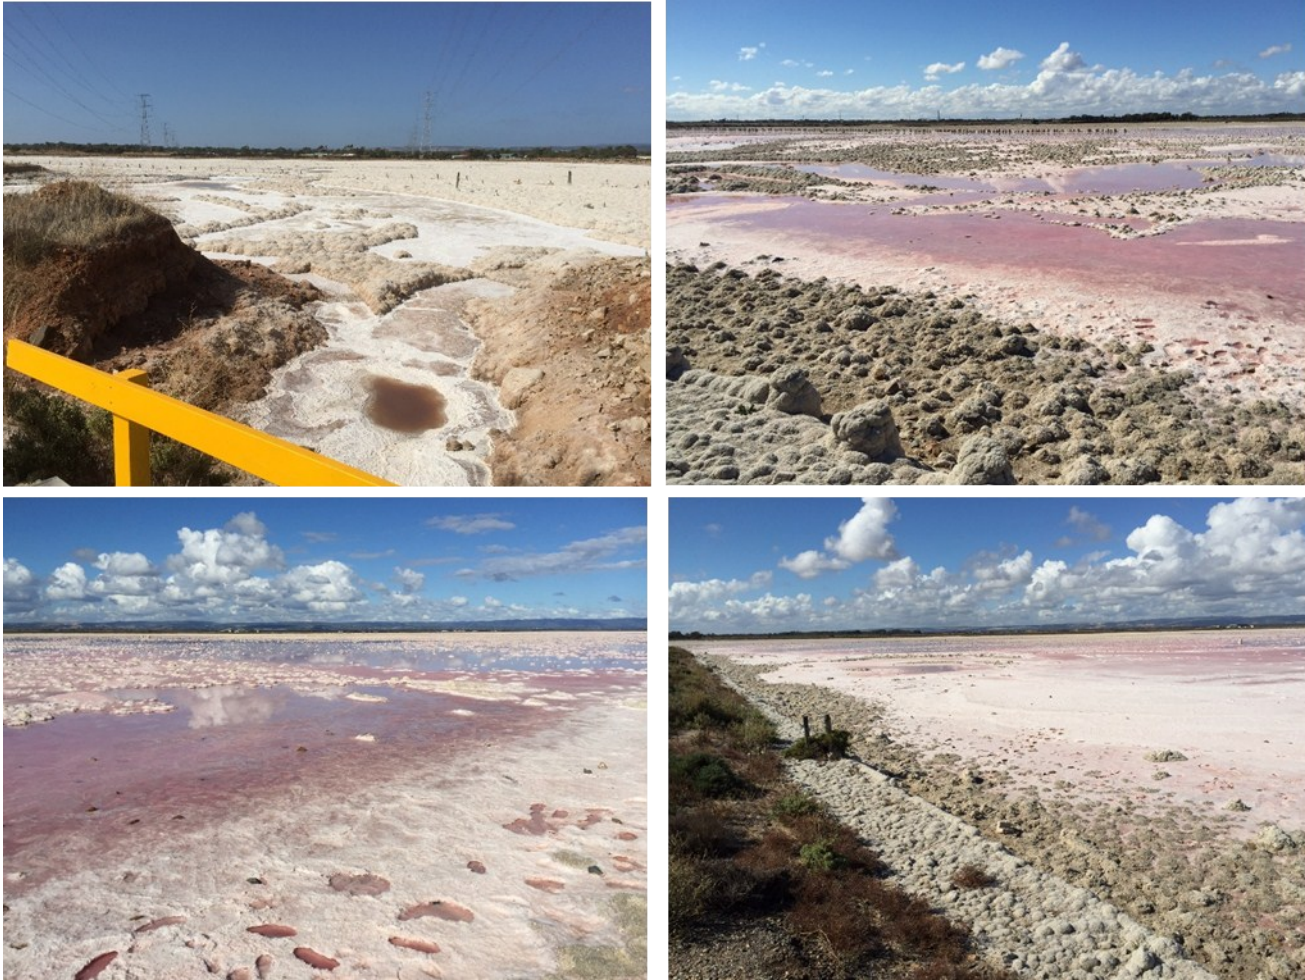

**Figure S3.** Photographs of the Dry Creek solar salt fields in proximity of where sediments were collected from.

### Selected test species relevance

Previous species diversity surveys of a tidal saltmarsh in the region identified twelve macroinvertebrate taxa, which included polychaetes, gastropods, bivalves, amphipods and dipteran (flies). This range was similar to the range of species selected for our study, making ideal for field-comparison. In contrast the species richness within salt ponds at Dry Creek was low (see image and table below, unpublished data), which correlates to the tolerances observed within this work.

**Table S1.** Species richness from tidal saltmarsh and two evaporative salt ponds (A and B).

| Group      | Taxa                          | Tidal saltmarsh | Salty Creek | Saltpond A | Saltpond B |
|------------|-------------------------------|-----------------|-------------|------------|------------|
| Nematoda   | Nematoda                      | ✓               | .           | .          | .          |
| Mollusca   | <i>Salinator fragilis</i>     | ✓               | ✓           | .          | .          |
| Mollusca   | <i>Marinula xanthosoma</i>    | .               | .           | ✓          | .          |
| Crustacea  | Eusiridae                     | ✓               | .           | .          | .          |
| Crustacea  | Talitridae                    | .               | ✓           | .          | .          |
| Crustacea  | <i>Halonicus</i> sp.          | .               | .           | .          | ✓          |
| Crustacea  | <i>Paratemia zietiana</i>     | ✓               | .           | .          | .          |
| Diptera    | <i>Ephydra</i> sp.            | .               | .           | ✓          | ✓          |
| Diptera    | <i>Culicoides</i> sp.         | ✓               | .           | .          | .          |
| Diptera    | <i>Tanytarsus barbitarsus</i> | ✓               | ✓           | ✓          | ✓          |
| Diptera    | Dolichopodidae                | .               | .           | .          | ✓          |
| Polychaeta | <i>Capitella</i> spp.         | ✓               | .           | .          | .          |
| Polychaeta | <i>Simplesetia</i> sp.        | ✓               | .           | .          | .          |
| Polychaeta | <i>Nephtys</i> sp.            | ✓               | .           | .          | .          |

\* Source: Environment Protection Authority (South Australia)

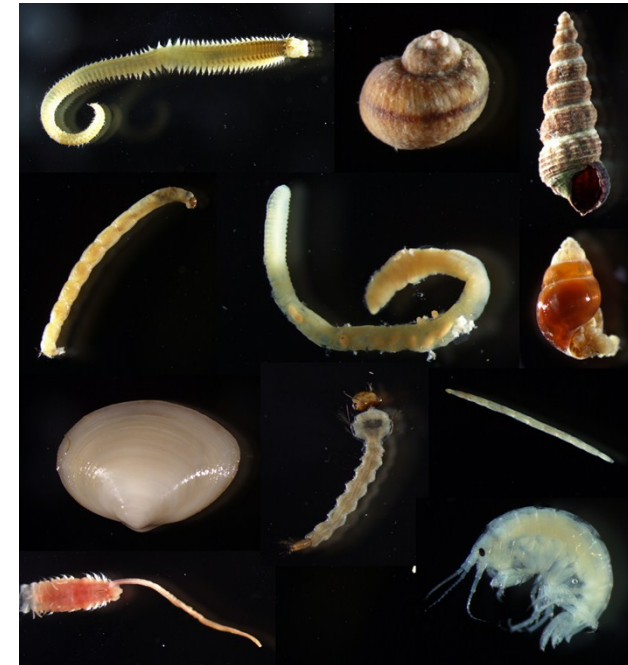

**Figure S4.** Taxa identified from the healthy tidal saltmarsh

**Table S2.** Summary table of the specifications used for each bioassay undertaken.

| Test                         | Organism   | Species                 | Size             | Endpoint                     | Test Chamber                                                                                                                                                | Duration                              | Test quantities                                                   |
|------------------------------|------------|-------------------------|------------------|------------------------------|-------------------------------------------------------------------------------------------------------------------------------------------------------------|---------------------------------------|-------------------------------------------------------------------|
| <b>Behavioural bioassays</b> |            |                         |                  |                              |                                                                                                                                                             |                                       |                                                                   |
| Sediment                     | Amphipod   | <i>M. plumulosa</i>     | Adult, 1 – 2 cm  | Avoidance                    | Sistema® 3 L polyethylene container (150 × 100 × 250 mm). Plastic divider (100 mm high) was installed in the centre of the exposure chamber.                | 120 h                                 | 2 cm sediment covered by 5 cm fresh seawater                      |
|                              | Gastropod  | <i>P. ebeninus</i>      | 3 – 4 cm         | Avoidance                    | Home Leisure® StoreMAX 4 L polypropylene container (185 × 116 × 325 mm). Plastic divider (116 mm high) was installed in the centre of the exposure chamber. |                                       | 4 cm sediment covered by 10 cm fresh seawater                     |
| Porewater-brines             | Gastropod  | <i>P. ebeninus</i>      | 3 – 4 cm         | Time to flip                 | 250 mL borosilicate beaker                                                                                                                                  | 120 h                                 | 150 mL of test solution per replicate                             |
|                              | Bivalve    | <i>P. deltoides</i>     | 5 – 6 cm         | Time to bury                 | 400 mL borosilicate beaker                                                                                                                                  |                                       | 150 mL of test solution and 8 cm of clean sand per replicate      |
| <b>Endurance bioassays</b>   |            |                         |                  |                              |                                                                                                                                                             |                                       |                                                                   |
| Porewater-brines             | Amphipod   | <i>V. australiensis</i> | 2 – 3 cm         | Endurance<br>(Time to death) | 250 mL borosilicate beaker                                                                                                                                  | 68 h                                  | 150 mL of test solution per replicate                             |
|                              |            | <i>M. plumulosa</i>     | 1 – 2 cm         |                              | 250 mL borosilicate beaker                                                                                                                                  |                                       | 150 mL of test solution per replicate                             |
|                              | Copepod    | <i>N. spinipes</i>      | ~1 mm            |                              | Falcon™ polystyrene microplates (2 m <sup>2</sup> , 24-well)                                                                                                | 2 mL of test solution per replicate   |                                                                   |
|                              | Crab       | <i>P. erythodactyla</i> | 4 – 5 cm         |                              | 1 L borosilicate beaker                                                                                                                                     | 200 mL of test solution per replicate |                                                                   |
|                              | Polychaete | <i>N. succinea</i>      | 3 – 4 cm         |                              | Techno Plas polystyrene petri dish (90 × 140 mm)                                                                                                            | 25 mL of test solution per replicate  |                                                                   |
| <b>Sub-lethal bioassays</b>  |            |                         |                  |                              |                                                                                                                                                             |                                       |                                                                   |
| Sediment                     | Amphipod   | <i>M. plumulosa</i>     | Adult, 1 – 2 cm  | Survival and reproduction    | 250 mL borosilicate beaker                                                                                                                                  | 10 d                                  | Approximately 40 g of test sediment and 240 mL of fresh seawater. |
| Porewater-brines             | Shrimp     | <i>A. salina</i>        | Cysts<br>Nauplii | Developmental<br>Survival    | Sigma® cell polystyrene cell culture plates (9.5 cm <sup>2</sup> , 6 wells/plate)                                                                           | 48 h                                  | 5 mL of test solution per replicate                               |

**Table S3.** Summary of physicochemical parameters of test waters

| Bioassay                            | pH        | N-NH <sub>3</sub><br>(mg/L) | Dissolved O <sub>2</sub><br>(mg/L) | Temperature<br>(°C) |
|-------------------------------------|-----------|-----------------------------|------------------------------------|---------------------|
| <b>Sediment-based tests</b>         |           |                             |                                    |                     |
| <b>Avoidance</b>                    |           |                             |                                    |                     |
| Amphipod (MP)                       | 7.6 - 8.3 | 0.0 - 2.0                   | 98 - 99                            | 21.1 - 22.5         |
| Gastropod                           | 7.8 - 8.1 | 0.5 - 1.5                   | 98 - 99                            | 21.1 - 22.5         |
| <b>Sub-lethal tests</b>             |           |                             |                                    |                     |
| Amphipod (MP)                       | 7.6 - 8.3 | 1.0 - 4.0                   | 98 - 99                            | 21.2 - 22.0         |
| <b>Pore water-brine based tests</b> |           |                             |                                    |                     |
| <b>Behavioural</b>                  |           |                             |                                    |                     |
| Bivalve                             | 7.0 - 8.2 | 1.5 - 4.0                   | 97 - 99                            | 21.1 - 21.5         |
| Gastropod                           | 7.6 - 8.1 | 1.5 - 2.5                   | 97 - 100                           | 20.9 - 21.3         |
| <b>Endurance</b>                    |           |                             |                                    |                     |
| Amphipod (MP)                       | 7.2 - 7.9 | 0.5 - 1.5                   | 98 - 100                           | 21.1 - 21.5         |
| Amphipod (VA)                       | 7.3 - 8.3 | 0.5 - 2.0                   | 97 - 99                            | 20.5 - 21.9         |
| Copepod                             | 7.2 - 8.2 | 1.0 - 2.0                   | 97 - 99                            | 21.0 - 21.9         |
| Crab                                | 7.5 - 8.3 | 0.5 - 4.0                   | 95 - 99                            | 21.1 - 21.5         |
| Polychaete                          | 7.5 - 8.2 | 1.5 - 4.0                   | 96 - 99                            | 21.5 - 21.8         |
| <b>Sub-lethal tests</b>             |           |                             |                                    |                     |
| Shrimp Survival                     | 7.3 - 8.3 | 0.0                         | 97 - 100                           | 21.5 - 22.6         |
| Shrimp Development                  | 7.5 - 8.3 | 0.0 - 0.5                   | 97 - 99                            | 21.2 - 21.9         |

\*Data presented as ranges between treatments throughout the test periods.

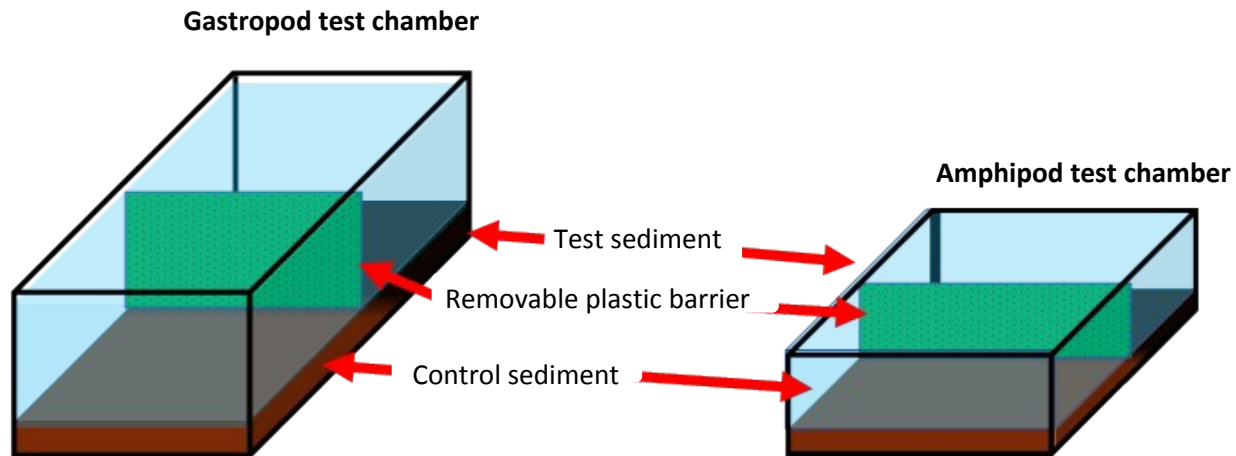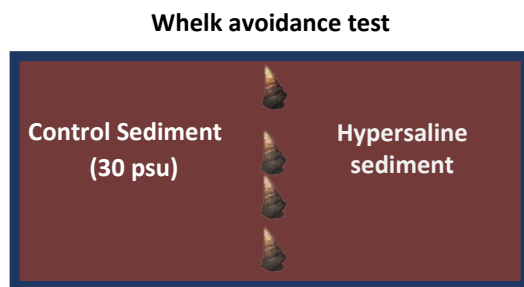

Whelks placed on central border between two sediments

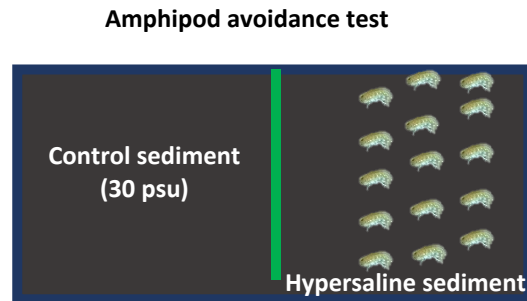

Perspex barrier installed before amphipods were added but removed when the test commenced.

Figure S5 Avoidance test chamber designs and experiment process

Figure S6. XRD powder diffraction pattern (PDF) for the 400 psu and RO-washed 100 psu Dry Creek sediment

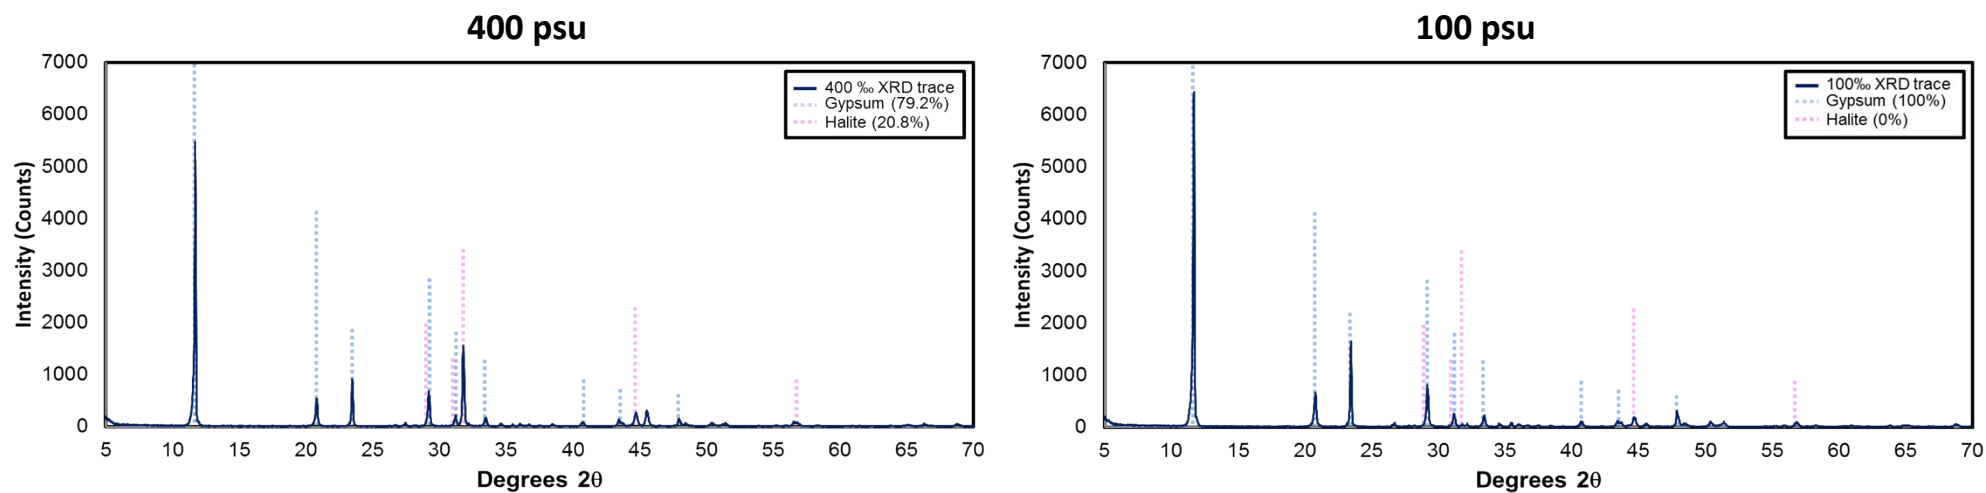

Reference peaks obtained from Mindat.Org (2017).

**Table S4. Physicochemistry**

| <i>Sediment</i>             |                  |                |                          |                |            |                 |
|-----------------------------|------------------|----------------|--------------------------|----------------|------------|-----------------|
| Salinity (psu)              | <i>&lt;63 μm</i> | <i>TOC</i>     | <i>Moisture Content</i>  | <i>AVS</i>     |            |                 |
|                             |                  |                | %                        | μmol/g         |            |                 |
| <b>29 (Ref)</b>             | 40 ± 3.0         | 1.64           | 0.5 ± 0.0                | 0.3 ± 0.0      |            |                 |
| <b>400 (Undiluted)</b>      | 20 ± 1.5         | 0.68           | 0.4 ± 0.0                | 5.4 ± 0.4      |            |                 |
| <i>Porewater properties</i> |                  |                |                          |                |            |                 |
| Treatment (psu)             | pH               | Salinity (psu) | N-NH <sub>3</sub> (mg/L) | Density (g/mL) | TDS (g/mL) | Turbidity (Abs) |
| <b>30 (Seawater)</b>        | 8.0              | 30.2           | 0                        | 1.1 ± 0.1      | 2.0 ± 0.1  | 0.006           |
| <b>22 (Brine)</b>           | 7.3              | 29.0           | 0                        | 1.9 ± 0.3      | 2.0 ± 0.3  | 0.23            |
| <b>40</b>                   | 6.7              | 40.2           | 0                        | 1.0 ± 0.0      | 2.0 ± 0.0  | 0.89            |
| <b>50</b>                   | 6.7              | 50.0           | 1.0                      | 1.0 ± 0.1      | 2.0 ± 0.1  | 0.78            |
| <b>50<sup>(A)</sup></b>     | 8.1              | 50.2           | 0                        | 1.0 ± 0.1      | 2.0 ± 0.1  | 0.13            |
| <b>80</b>                   | 7.5              | 80             | 1.0                      | 1.1 ± 0.1      | 2.1 ± 0.3  | 2.7             |
| <b>100</b>                  | 8.3              | 100            | 2.0                      | 1.6 ± 0.5      | 2.8 ± 0.8  | 2.0             |
| <b>200</b>                  | 7.7              | 201            | 4.0                      | 1.6 ± 0.1      | 2.4 ± 0.1  | 10              |
| <b>300</b>                  | 7.3              | 310            | 4.0                      | 2.1 ± 0.1      | 3.3 ± 0.2  | 10              |
| <b>400 (Undiluted)</b>      | 7.5              | 409            | 4.0                      | 2.6 ± 0.1      | 3.5 ± 0.5  | 10              |

< 63 μm fraction (n=2, mean ± SD), TOC = total organic carbon (n=1), moisture content (n=2, mean ± SD).

**Table S5. Sediment metal concentrations**

| Porewater salinity (psu)      | TRM CONCENTRATIONS (mg/kg) |           |             |           |            |           |             |            |            |           |           |            |
|-------------------------------|----------------------------|-----------|-------------|-----------|------------|-----------|-------------|------------|------------|-----------|-----------|------------|
|                               | Al                         | As        | Cd          | Co        | Cr         | Cu        | Fe          | Mn         | Ni         | Pb        | V         | Zn         |
| Control (30)                  | 6340 ± 100                 | 11 ± 1.3  | 0.2 ± 0.04  | 2.8 ± 0.2 | 14 ± 0.1   | 16 ± 0.2  | 13200 ± 406 | 0.6 ± 0.2  | 4.9 ± 0.3  | 29 ± 1.0  | 21 ± 0.04 | 87 ± 0.5   |
| 50                            | 1050 ± 150                 | 1.1 ± 0.1 | 0.02 ± 0.01 | 0.8 ± 0.4 | 1.8 ± 0.2  | 1.6 ± 0.4 | 1390 ± 183  | 6.0 ± 0.7  | 0.6 ± 0.1  | 1.7 ± 0.2 | 6.3 ± 0.6 | 5.8 ± 0.6  |
| 100                           | 2030 ± 110                 | 0.7 ± 0.2 | 0.04 ± 0.02 | 1.1 ± 0.3 | 3.4 ± 0.04 | 3.1 ± 0.3 | 2512 ± 84   | 11 ± 0.004 | 1.3 ± 0.1  | 3.1 ± 0.6 | 10 ± 0.6  | 10 ± 0.1   |
| 250                           | 268 ± 80                   | 1.1 ± 0.1 | 0.01 ± 0.01 | 0.7 ± 0.4 | 0.4 ± 0.01 | 0.4 ± 0.5 | 303 ± 44    | 2.4 ± 0.4  | 0.1 ± 0.1  | 0.7 ± 0.1 | 4.3 ± 1.7 | 2.2 ± 0.01 |
| 400                           | 445 ± 170                  | 0.6 ± 0.1 | 0.01 ± 0.01 | 0.2 ± 0.2 | 0.6 ± 0.1  | 0.6 ± 0.2 | 488 ± 105   | 3.2 ± 0.6  | 0.5 ± 0.04 | 0.4 ± 0.4 | 3.5 ± 0.8 | 4.1 ± 0.4  |
| <b>Guideline Value (SQGV)</b> |                            | 1.5       |             |           |            | 65        |             |            | 21         | 50        |           | 200        |

TRM = microwave-assisted aqua-regia digested metal fraction, n=2, mean ± SD. The guideline values are from Simpson and Batley.<sup>27</sup>

**Table S6.** Selected compositions of unwashed and washed Dry Creek sediment and pore water-brines

| Sediments |                    |           |                       |           |          |           |  |  |  |  |
|-----------|--------------------|-----------|-----------------------|-----------|----------|-----------|--|--|--|--|
| Treatment | Porewater salinity |           | Concentrations (g/kg) |           |          |           |  |  |  |  |
|           | (psu)              | Na        | K                     | Mg        | Ca       | S         |  |  |  |  |
| Control   | 30±1.3             | 3.6 ± 0.1 | 0.7 ± 0.01            | 2.8 ± 0.1 | 27 ± 2.1 | 1.3 ± 0.2 |  |  |  |  |
| Wash 3    | 50 ± 2.5           | 8.7 ± 0.1 | 0.5 ± 0.4             | 1.9 ± 0.1 | 111 ± 2  | 60 ± 3.8  |  |  |  |  |
| Wash 2    | 100 ± 1.5          | 18 ± 4    | 1.1 ± 0.1             | 3.6 ± 0.4 | 127 ± 3  | 62 ± 16   |  |  |  |  |
| Wash 1    | 200 ± 1.2          | 29 ± 4    | 0.5 ± 0.01            | 2.1 ± 0.1 | 105 ± 3  | 50 ± 9.9  |  |  |  |  |
| Unwashed  | 400 ± 1.0          | 79 ± 5    | 1.2 ± 0.2             | 5.0 ± 0.8 | 91 ± 11  | 44 ± 7.6  |  |  |  |  |

  

| Porewater-brines  |                               |                          |                                |             |            |             |             |                 |                 |                               |
|-------------------|-------------------------------|--------------------------|--------------------------------|-------------|------------|-------------|-------------|-----------------|-----------------|-------------------------------|
| Salinity (psu)    | Density (g mL <sup>-1</sup> ) | I (mol L <sup>-1</sup> ) | Dissolved concentrations (g/L) |             |            |             |             |                 |                 |                               |
|                   |                               |                          | Na                             | K           | Mg         | Ca          | S           | Cl <sup>-</sup> | Br <sup>-</sup> | SO <sub>4</sub> <sup>2-</sup> |
| Control 30        | 1.1 ± 0.1                     | 0.6                      | 8.2 ± 0.04                     | 0.3 ± 0.002 | 1.1 ± 0.01 | 0.4 ± 0.01  | 0.9 ± 0.02  | 17              | 0.06            | 2.5                           |
| 50                | 1.0 ± 0.1                     | 1                        | 18 ± 0.6                       | 0.5 ± 0.01  | 1.5 ± 0.02 | 0.94 ± 0.09 | 1.3 ± 0.09  | 28              | 0.08            | 3.4                           |
| 100               | 1.6 ± 0.1                     | 1.9                      | 26 ± 0.7                       | 0.7 ± 0.04  | 0.7 ± 0.04 | 3.8 ± 0.1   | 0.98 ± 0.06 | 56*             | 0.16*           | 6.8*                          |
| 200               | 1.6 ± 0.1                     | 2.9                      | 31 ± 0.9                       | 0.8 ± 0.01  | 2.8 ± 0.06 | 2.4 ± 0.05  | 2.9 ± 0.03  | 112*            | 0.32*           | 14*                           |
| 400               | 2.6 ± 0.1                     | 6.3                      | 78 ± 0.6                       | 3.0 ± 0.04  | 10 ± 0.1   | 0.57 ± 0.10 | 4.8 ± 0.05  | 224*            | 0.64*           | 27*                           |
| 50 <sup>(†)</sup> | 1.0 ± 0.1                     | 1.2                      | 11 ± 0.3                       | 0.3 ± 0.003 | 1.6 ± 0.02 | 0.41 ± 0.03 | 0.9 ± 0.03  | 47              | 0.06            | 5.6                           |

Control sediment: non-hypersaline, uncontaminated sediment; control pore water = seawater (31 ± 1 psu). Sediment treatments unwashed = original sediment and washes undertaken using RO water. Porewater brines isolated from the Dry Creek sediment initially and following consecutive washes; † represents an artificial brine created from the dissolution of artificial seasalts in seawater, until the salinity of ~50 psu was reached. Additional pore water-brine treatments of 40, 60, 65, 70, 80 and 300 psu were prepared by dilution of the brines with RO water. Detailed dissolved ionic analyses of these dilutions were not undertaken, but analyte concentrations are assumed to decrease linearly. Density was measured gravimetrically. I = ionic strength (calculated using concentrations only for Na<sup>+</sup>, Mg<sup>2+</sup>, K<sup>+</sup>, Ca<sup>2+</sup>, Cl<sup>-</sup>, Br<sup>-</sup>, HCO<sub>3</sub><sup>-</sup>). \*=Extrapolated from anion concentrations in 50 psu brine. For both sediment and brine analyses, n=2, mean ± SD. Measurements for total dissolved solids (TDS) and turbidity (light absorbance at 750 nm) are presented within the Supporting Information.



**Table S7.** Behavioural toxicological effects (avoidance) of salinity to *M. plumulosa* and *P. ebeninus*

| Sediment               |                    |                          |                          |           |                                         |                |           |
|------------------------|--------------------|--------------------------|--------------------------|-----------|-----------------------------------------|----------------|-----------|
| Treatment              |                    | Population residence (%) |                          |           |                                         | Population (%) |           |
| Left side              | Right Side         | Amphipod                 |                          | Gastropod |                                         | Buried         | Flipped   |
|                        |                    | Left side                | Right Side               | Left side | Right Side                              |                |           |
| 29 psu                 | 29 psu             | 44 ± 5.9                 | 56 ± 10                  | 50 ± 6.5  | 50 ± 6.5                                | 88 ± 5.6       | 0.0 ± 0.0 |
| 29 psu                 | 50 psu             | 59 ± 2.9                 | 41 ± 2.9                 | 46 ± 7.7  | 54 ± 7.7                                | 67 ± 11        | 33 ± 11   |
| 29 psu                 | 100 psu            | 79 ± 4.0                 | 19 ± 2.9                 | 75 ± 9.1  | 21 ± 10                                 | 38 ± 14        | 67 ± 12   |
| Porewater-brines       |                    |                          |                          |           |                                         |                |           |
| Bivalve – time to bury |                    |                          | Gastropod – time to flip |           |                                         |                |           |
| Salinity (psu)         | Time to bury (min) | Salinity (psu)           | During exposure (min)    |           | Post-exposure (seawater recovery) (min) |                |           |
| 30 psu (control)       | 5.0 ± 0.3          | 30 psu (control)         | 2.2 ± 0.2                |           | 3.8 ± 0.2                               |                |           |
| 40 psu                 | 23 ± 3.7           | 50 psu(A)                | 11 ± 0.6                 |           | 16 ± 1.1                                |                |           |
| 50 psu <sup>(†)</sup>  | 39 ± 2.2           | 65 psu                   | 7.7 ± 0.4                |           | 37 ± 1.5                                |                |           |
| 50 psu                 | 0.0 ± 0.0          | 80 psu                   | 47 ± 0.6                 |           | 80 ± 2.0                                |                |           |
| 400 psu                | 0.0 ± 0.0          | 100 psu                  | -88 ± 7.5                |           | 92 ± 0.9                                |                |           |
|                        |                    | 200 psu                  | 0.0 ± 0.0                |           | 0.0 ± 0.0                               |                |           |
|                        |                    | 300 psu                  | 0.0 ± 0.0                |           | 0.0 ± 0.0                               |                |           |
|                        |                    | 400 psu                  | 0.0 ± 0.0                |           | 0.0 ± 0.0                               |                |           |

**Sediment bioassays:** data = mean ± SE (*M. plumulosa*: n=4, using 30 organisms per replicate) (*P. ebeninus*: n=6, using 4 organisms per replicate).

**Porewater-brine bioassays:** data = mean ± SE (*P. deltooides*: n=3, 1 bivalve per replicate) (*P. ebeninus*: n=3, 2 gastropods per beaker).

50 psu<sup>(†)</sup> = represents an artificial brine created from the dissolution of artificial sea salts in seawater, until the salinity of ~50 psu was reached.

**Table S8.** Endurance bioassay data and calculated salinity thresholds for survival of organisms<sup>a</sup>

| <b>Organism</b>                          |               | <b>Copepod</b>     | <b>Amphipod</b>     |                         | <b>Crab</b>             | <b>Polychaete</b>  |
|------------------------------------------|---------------|--------------------|---------------------|-------------------------|-------------------------|--------------------|
| <b>Species</b>                           |               | <i>N. spinipes</i> | <i>M. plumulosa</i> | <i>V. australiensis</i> | <i>P. erythodactyla</i> | <i>N. succinea</i> |
| <b>Habitat</b>                           |               | epibenthic         | epibenthic          | endobenthic             | epi/endobenthic         | endobenthic        |
| <b>Time to death (h)</b>                 |               |                    |                     |                         |                         |                    |
| <b>Salinity (psu)</b>                    | <b>22</b>     | NR                 | NR                  | NR                      | NR                      | NR                 |
|                                          | <b>30</b>     | NR                 | NR                  | NR                      | NR                      | NR                 |
|                                          | <b>40</b>     | NR                 | NR                  | NR                      | NR                      | NR                 |
|                                          | <b>50 (A)</b> | NR                 | NR                  | NR                      | NR                      | NR                 |
|                                          | <b>50</b>     | 68 ± 0.0           | NR                  | 51 ± 0.1                | NR                      | NR                 |
|                                          | <b>60</b>     | 24 ± 0.6           | 51 ± 0.0            | 38 ± 0.1                | NR                      | NR                 |
|                                          | <b>65</b>     | 3.0 ± 0.1          | 9.0 ± 0.2           | 3.4 ± 0.5               | NR                      | NR                 |
|                                          | <b>70</b>     | 2.5 ± 0.0          | 5.0 ± 0.1           | 1.1 ± 0.1               | NR                      | 2.1 ± 0.4          |
|                                          | <b>80</b>     | 1.0 ± 0.0          | 1.5 ± 0.1           | 0.4 ± 0.01              | 5.0 ± 0.03              | 1.0 ± 0.07         |
|                                          | <b>100</b>    | -                  | 1.0 ± 0.1           | 0.3 ± 0.01              | 4.2 ± 0.04              | -                  |
|                                          | <b>130</b>    | 0.02 ± 0.01        | 0.2 ± 0.01          | 0.3 ± 0.01              | 3.4 ± 0.03              | 0.5 ± 0.02         |
|                                          | <b>190</b>    | -                  | -                   | 0.3 ± 0.01              | -                       | -                  |
|                                          | <b>200</b>    | -                  | -                   | 0.3 ± 0.01              | -                       | -                  |
|                                          | <b>290</b>    | 0.01 ± 0.001       | 0.04 ± 0.01         | 0.2 ± 0.002             | 1.2 ± 0.02              | 0.4 ± 0.01         |
|                                          | <b>300</b>    | -                  | -                   | -                       | -                       | 0.3 ± 0.02         |
|                                          | <b>400</b>    | 0.005 ± 0.002      | 0.02 ± 0.0          | 0.2 ± 0.01              | 0.9 ± 0.01              | 0.2 ± 0.01         |
| <b>Estimated lethal salinities (psu)</b> |               |                    |                     |                         |                         |                    |
|                                          | <b>6</b>      | 58                 | 61                  | 59                      | 74                      | 71                 |
| <b>Time</b>                              | <b>12</b>     | 57                 | 59                  | 58                      | 74                      | 69                 |
| <b>(hours)</b>                           | <b>24</b>     | 55                 | 58                  | 56                      | 73                      | 68                 |
|                                          | <b>48</b>     | 52                 | 55                  | 54                      | 72                      | 68                 |

<sup>a</sup>Organisms were exposed in brine solutions for 68 h (copepods and amphipods), and 120 h (polychaete and crab) with the time taken for mortality timed for each organism in each replicate (n=3-4). Salinity of 30 psu is the seawater control - = Not Tested. (mean ± SE); NR= No Response; † represents an artificial brine created from the dissolution of artificial sea salts in seawater, until the salinity of ~50 psu was reached.

**Table S9.** Chronic toxicity of *M. plumulosa* and *A. Salina* to sediments and elutriates.

| <b><i>M. plumulosa</i> (10-day sediment bioassay)</b> |                         |          |                                  |          |
|-------------------------------------------------------|-------------------------|----------|----------------------------------|----------|
| Porewater Salinity (psu)                              | Survival                |          | Ave. offspring/ female           |          |
|                                                       | ( % control)            |          |                                  |          |
| 30 (control)                                          | 100 ± 2.9               |          | 100 ± 5.0                        |          |
| 50                                                    | 79 ± 8.8                |          | 80 ± 12                          |          |
| 70                                                    | 79 ± 8.8                |          | 47 ± 4.7                         |          |
| 80                                                    | 63 ± 3.0                |          | 35 ± 18                          |          |
| 100                                                   | 74 ± 2.9                |          | 19 ± 4.0                         |          |
| 200                                                   | 71 ± 5.1                |          | 16 ± 2.8                         |          |
| 300                                                   | 53 ± 0.0                |          | 6.8 ± 3.6                        |          |
| Calculated EC Values                                  | Salinity (psu)          | 95 % CI  | Salinity (psu)                   | 95 % CI  |
| EC <sub>20</sub>                                      | >65                     | ND       | 37                               | (20, 70) |
| EC <sub>50</sub>                                      | >100                    | ND       | 65                               | (50,84)  |
| <b><i>A. salina</i> (48-h brine bioassays)</b>        |                         |          |                                  |          |
| Porewater-brine Salinity (psu)                        | Acute bioassay Survival |          | Chronic Bioassay Hatched nauplii |          |
|                                                       | ( % control)            |          |                                  |          |
| 30                                                    | 100 ± 0.4               |          | 101 ± 3.4                        |          |
| 40 <sup>(†)</sup>                                     | 98 ± 0.5                |          | 88 ± 4.4                         |          |
| 40                                                    | 94 ± 1.5                |          | 76 ± 7.7                         |          |
| 50 <sup>(†)</sup>                                     | 97 ± 0.4                |          | 79 ± 3.6                         |          |
| 50                                                    | 92 ± 0.4                |          | 54 ± 2.5                         |          |
| 100 <sup>(†)</sup>                                    | 36 ± 0.6                |          | 0.0 ± 0.0                        |          |
| 100                                                   | 21 ± 0.6                |          | 2.4 ± 1.7                        |          |
| 200                                                   | 0.0 ± 0.0               |          | 0 ± 0.0                          |          |
| 400                                                   | 0.0 ± 0.0               |          | 0 ± 0.0                          |          |
| Calculated EC Values                                  | Salinity (psu)          | 95 % CI  | Salinity (psu)                   | 95 % CI  |
| EC <sub>20</sub>                                      | 64                      | (54, 76) | 41                               | (35,49)  |
| EC <sub>50</sub>                                      | 96                      | (84,110) | 54                               | (49,59)  |

Data for *M. plumulosa*: n=3, mean ± SE. ND= not able to be determined from the data.

For *A. salina*: n=4. Mean ± SE. Salinity of 30 psu is the seawater control - = Not Tested. (mean ± SE);

-NR= No Response; † represents an artificial brine created from the dissolution of artificial seasalts in seawater, until the defined salinity was reached.

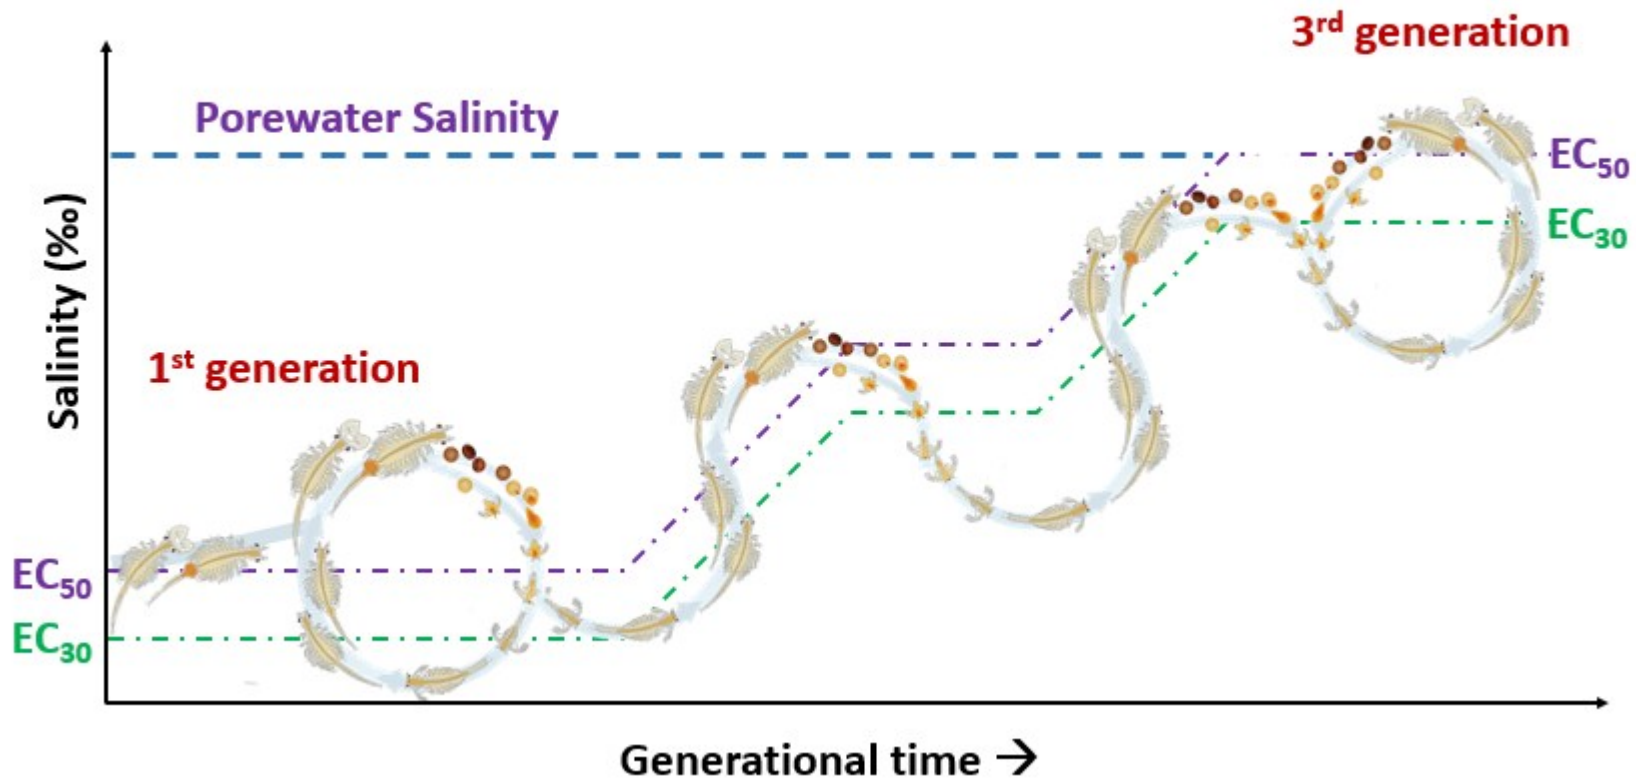

Figure S7. Example of generational adaptation to salinity. Adapted from: <http://fishkeepingadvice.com/brine-shrimp/>.
